# Supplementary material for: SARS-CoV-2-related paediatric inflammatory multisystem syndrome, an epidemiological study, France, 1 March to 17 May 2020
Source: PubMed Central journal article supplement (PMC7336112; doi:10.2807/1560-7917.es.2020.25.22.2001010), 2020-06-04
Supplement: 20-01010_BELOT_Supplement.pdf [file 20-01010_BELOT_Supplement.pdf]

This supplementary material is hosted by Eurosurveillance as supporting information alongside the article [SARS-CoV-2-related paediatric inflammatory multisystem syndrome, an epidemiological study, France, 1 March to 17 May 2020], on behalf of the authors, who remain responsible for the accuracy and appropriateness of the content. The same standards for ethics, copyright, attributions and permissions as for the article apply. Supplements are not edited by Eurosurveillance and the journal is not responsible for the maintenance of any links or email addresses provided therein.

Supplementary Table: Comparison of current case definitions

|                       | CASE DEFINITION                                                                                                                                                                                                                        |                                                                                                                                                                                                                                                                                                                                                                                                                                                                                              |                                                                                                                                                                                                                         |                                                                                                                                                                                                                                                                                                                                                   |
|-----------------------|----------------------------------------------------------------------------------------------------------------------------------------------------------------------------------------------------------------------------------------|----------------------------------------------------------------------------------------------------------------------------------------------------------------------------------------------------------------------------------------------------------------------------------------------------------------------------------------------------------------------------------------------------------------------------------------------------------------------------------------------|-------------------------------------------------------------------------------------------------------------------------------------------------------------------------------------------------------------------------|---------------------------------------------------------------------------------------------------------------------------------------------------------------------------------------------------------------------------------------------------------------------------------------------------------------------------------------------------|
|                       | French Surveillance<br>(30 <sup>th</sup> April 2020)<br>Pediatric Inflammatory<br>Multisystem Syndrome                                                                                                                                 | WHO<br>(15 <sup>th</sup> May 2020) <sup>1</sup><br>Multisystem Inflammatory Syndrome in<br>children and adolescents temporally related<br>to COVID-19                                                                                                                                                                                                                                                                                                                                        | US-CDC<br>(14 <sup>th</sup> May 2020) <sup>2</sup><br>Multisystem Inflammatory<br>Syndrome in Children (MIS-C)                                                                                                          | RCPCH<br>(1 <sup>st</sup> May 2020) <sup>3</sup><br>Paediatric multisystem inflammatory syndrome<br>temporally associated with COVID-19                                                                                                                                                                                                           |
| Inflammation          | Fever and systemic inflammation                                                                                                                                                                                                        | Fever >3 days AND elevated markers of<br>inflammation (ESR, CRP or procalcitonin)                                                                                                                                                                                                                                                                                                                                                                                                            | Fever, laboratory evidence of<br>inflammation                                                                                                                                                                           | Fever >38.5                                                                                                                                                                                                                                                                                                                                       |
| Age                   | 0-18 years                                                                                                                                                                                                                             | 0-19 years                                                                                                                                                                                                                                                                                                                                                                                                                                                                                   | <21 years                                                                                                                                                                                                               | Child                                                                                                                                                                                                                                                                                                                                             |
| Main features         | At least one of the following MAS,<br>myocarditis, seritis Kawasaki-Like<br>features (if evidence for SARS-CoV2<br>positive) or at least two items if<br>pending missing virological results                                           | At least Two of the following:<br>-Rash or bilateral non-purulent<br>conjunctivitis or muco-cutaneous<br>inflammation signs (oral, hands or feet).<br>-Hypotension or shock.<br>-Features of myocardial dysfunction,<br>pericarditis, valvulitis, or coronary<br>abnormalities (including ECHO findings or<br>elevated Troponin/NT-proBNP),<br>-Evidence of coagulopathy (by PT, PTT,<br>elevated d-Dimers).<br>-Acute gastrointestinal problems<br>(diarrhea, vomiting, or abdominal pain). | Evidence of clinically severe<br>illness requiring<br>hospitalization, with<br>multisystem (>2) organ<br>involvement (cardiac, renal<br>respiratory, hematologic,<br>gastrointestinal, dermatologic<br>or neurological) | persistent fever, inflammation (neutrophilia,<br>elevated CRP<br>and lymphopaenia) and evidence of single or<br>multi-organ dysfunction (shock, cardiac,<br>respiratory, renal, gastrointestinal or<br>neurological disorder) with additional features.<br>This may include children fulfilling full or partial<br>criteria for Kawasaki disease. |
| Exclusion<br>criteria | Negative for both SARS-CoV2<br>related PCR and serology                                                                                                                                                                                | No other obvious microbial cause of<br>inflammation, including bacterial sepsis,<br>staphylococcal or streptococcal shock<br>syndromes.                                                                                                                                                                                                                                                                                                                                                      | No alternative plausible<br>diagnoses                                                                                                                                                                                   | Exclusion of any other microbial cause, including<br>bacterial sepsis, staphylococcal or streptococcal<br>shock syndromes, infections associated with<br>myocarditis such as enterovirus (waiting for<br>results of these investigations should not delay<br>seeking expert advice).                                                              |
| SARS-CoV2<br>status   | Positive for current or recent SARS-<br>CoV2 infection by RT-PCR, serology<br>(confirmed PIMS) or COVID-19<br>exposure or CT scan evovative<br>(Probable PIMS)<br>Pending or not performed in<br>Possible PIMS (at least two criteria) | Evidence of COVID-19 (RT-PCR, antigen test<br>or serology positive), or likely contact with<br>patients with COVID-19.                                                                                                                                                                                                                                                                                                                                                                       | Positive for current or recent<br>SARS-CoV2 infection by RT-<br>PCR, serology or antigen test<br>or COVID-19 exposure within<br>the 4 weeks prior to the onset<br>of symptoms                                           | SARS-CoV-2 PCR testing may be positive or<br>negative                                                                                                                                                                                                                                                                                             |

ESR: Erythrocyte sedimentation rate, CRP: C reactive protein, US-CDC: United States -Centers for Disease Control and Prevention, MAS: macrophage activation syndrome, RCPCH: Royal College of Paediatrics and Child Health, WHO: World Health Organization,

References:

1. World Health Organization (WHO). Multisystem inflammatory syndrome in children and adolescents temporally related to COVID-19. Geneva: WHO: 15 May 2020. Available from: <https://www.who.int/news-room/commentaries/detail/multisystem-inflammatory-syndrome-in-children-and-adolescents-with-covid-19>
2. Health Alert Network. Multisystem Inflammatory Syndrome in Children (MIS-C) Associated with Coronavirus Disease 2019 (COVID-19) CDCHAN-00432. Atlanta: Centers for Disease Control and Prevention; 14 May 2020. Available from: <https://emergency.cdc.gov/han/2020/han00432.asp>
3. Health Policy Team. Guidance - Paediatric multisystem inflammatory syndrome temporally associated with COVID-19. London: Royal College of Paediatrics and Child Health. Available from: <https://www.rcpch.ac.uk/resources/guidance-paediatric-multisystem-inflammatory-syndrome-temporally-associated-covid-19> (accessed May 30, 2020).
